# Supplementary material for: Interplay between porous texture and surface-active sites for efficient oxygen reduction reactions in N-inherited carbon
Source: Royal Society of Chemistry journal article supplement (doi:10.1039/d0nj00841a), 2020-01-01
Supplement: d0nj00841a1.pdf [file d0nj00841a1.pdf]

## Interplay between porous texture and surface-active sites for efficient oxygen reduction reactions in N-inherited carbon

Deviprasath Chinnadurai,<sup>a</sup> Rajmohan Rajendiran,<sup>a</sup> Aravindhya Raja Selvaraj,<sup>a</sup> Hee-Je Kim,<sup>a</sup> Kandasamy Prabakar.<sup>a\*</sup>

<sup>a</sup>Department of Electrical Engineering, Pusan National University, 2 Busandaehak-ro 63beon-gil, Geumjeong-gu, Busan-46241, Republic of Korea.

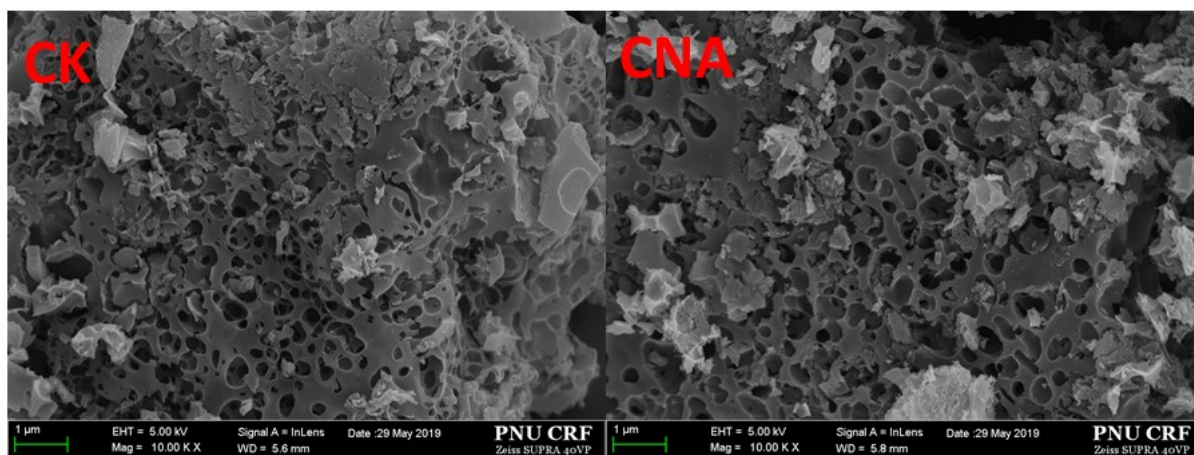

Figure S1. High magnification FE-SEM images of CK and CAN samples

**Table S1 Quantitative analysis of C, O and N from XPS analysis**

| Sample | C 1s | O 1s | N 1s |
|--------|------|------|------|
| CK     | 92.0 | 6.9  | 1.1  |
| CNA    | 85.6 | 12.0 | 2.4  |
| CAIR   | 90.6 | 7.8  | 1.6  |

**Table S2 Deconvoluted N peaks from XPS analysis.**

| Sample | Pyridinic-N | Pyrrolic-N | Quaternary-N | Oxidized-N |
|--------|-------------|------------|--------------|------------|
| CK     | 28.3        | 27.7       | 21.2         | 22.8       |
| CNA    | 26.4        | 46.6       | 27.0         | -          |
| CAIR   | 26.6        | 25.1       | 35.1         | 13.2       |

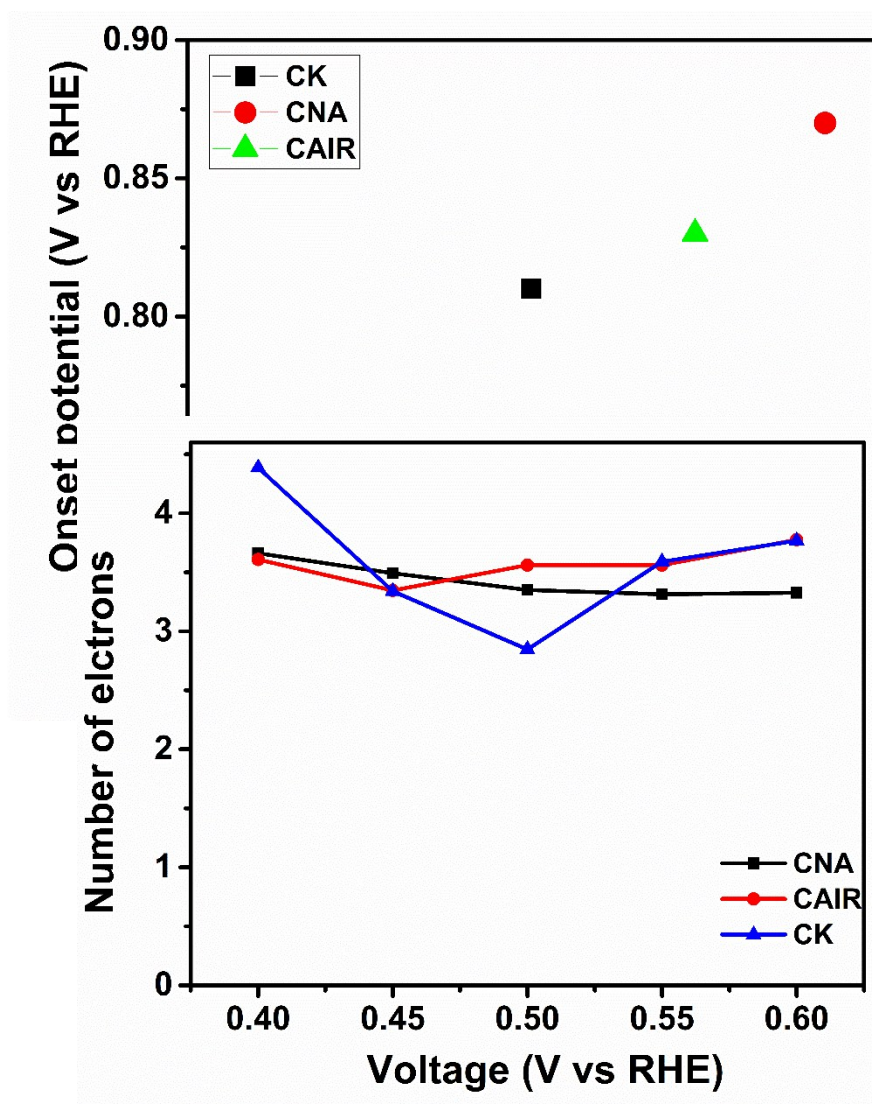

**Figure S3.** Transferred electron numbers after cycling

| <b>Catalyst</b>                                                | <b>E<sub>onset</sub> (V vs RHE)</b> | <b>E<sub>1/2</sub> (V vs RHE)</b> | <b>References</b> |
|----------------------------------------------------------------|-------------------------------------|-----------------------------------|-------------------|
| Okra derived carbon                                            | 0.975                               | 0.86                              | 1                 |
| Seaweed-Derived Nitrogen-Rich Porous Biomass Carbon            | 1.01                                | -                                 | 2                 |
| Protein hydrogel networks derived porous carbon                | 0.93                                | 0.83                              | 3                 |
| Carbon Materials Derived from Cellulose                        | 0.83                                | 81                                | 4                 |
| Ni and P doped carbon from waste biomass                       | 0.81                                | 0.67                              | 5                 |
| N, P and Fe Carbon derived from plant biomass                  | 0.957                               | 0.852                             | 6                 |
| Lignosulfonate biomass derived N and S co-doped porous carbon  | 0.80                                | -                                 | 7                 |
| Egg-Derived Mesoporous Carbon                                  | 0.84                                | 0.69                              | 8                 |
| peanut shell-based graphitic carbon                            | 0.91                                | 0.81                              | 9                 |
| protein-rich enoki mushroom biomass to a nitrogen-doped carbon | 0.94                                | 0.81                              | 10                |

|                                                     |             |             |                  |
|-----------------------------------------------------|-------------|-------------|------------------|
| <b>Mandarin Biomass derived N- inherited carbon</b> | <b>0.87</b> | <b>0.75</b> | <b>This work</b> |
|-----------------------------------------------------|-------------|-------------|------------------|

**Table S3**

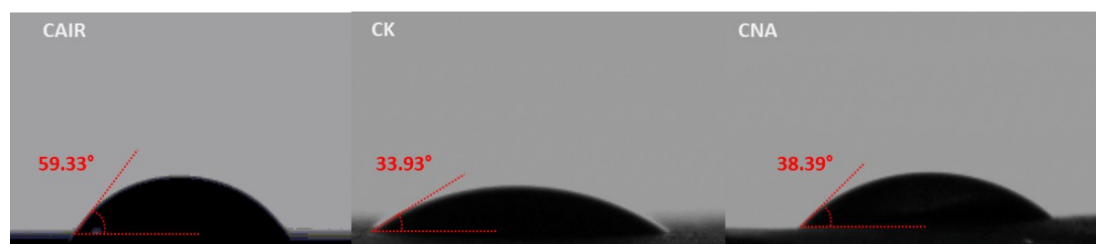

**Figure S4.** Wettability Contact angle measurement of carbon samples.

## References

1. R. F. Wang, H. Wang, T. B. Zhou, J. L. Key, Y. J. Ma, Z. Zhang, Q. Z. Wang and S. Ji, *Journal of Power Sources*, 2015, **274**, 741-747.
2. L. B. Zeng, X. Y. Li, S. Y. Fan, J. C. Mu, M. C. Qin, X. Y. Wang, G. Q. Gan, M. Tade and S. M. Liu, *Acs Sustainable Chemistry & Engineering*, 2019, **7**, 5057-5064.
3. L. Q. Wang, K. X. Liang, L. Deng and Y. N. Liu, *Applied Catalysis B-Environmental*, 2019, **246**, 89-99.
4. A. Wütscher, T. Eckhard, D. Hiltrop, K. Lotz, W. Schuhmann, C. Andronescu and M. J. C. Muhler, 2019, **6**, 514-521.
5. V. C. Hoang, V. G. Gomes and K. N. Dinh, *Electrochimica Acta*, 2019, **314**, 49-60.
6. W. Wan, Q. Wang, L. Zhang, H.-W. Liang, P. Chen and S.-H. J. J. o. M. C. A. Yu, 2016, **4**, 8602-8609.
7. M. L. Zhang, Y. L. Song, H. C. Tao, C. Yan, J. Masa, Y. C. Liu, X. Y. Shi, S. Z. Liu, X. Zhang and Z. Y. Sun, *Sustainable Energy & Fuels*, 2018, **2**, 1820-1827.
8. H. Wu, J. Geng, H. Ge, Z. Guo, Y. Wang and G. J. A. E. M. Zheng, 2016, **6**, 1600794.
9. Y. L. Wu, Y. L. Chen, H. Q. Wang, C. M. Wang, A. S. Wang, S. Zhao, X. Y. Li, D. F. Sun and J. Z. Jiang, *Journal of Materials Chemistry A*, 2018, **6**, 12018-12028.
10. C. Guo, W. Liao, Z. Li, L. Sun and C. J. N. Chen, 2015, **7**, 15990-15998.
